# Supplementary material for: Structural determinants of collapse by a monomolecular mimic of pulmonary surfactant at the physiological temperature
Source: Royal Society of Chemistry journal article supplement (doi:10.1039/d4sm00481g), 2024-01-01
Supplement: d4sm00481g1.pdf [file d4sm00481g1.pdf]

Supplemental Information:

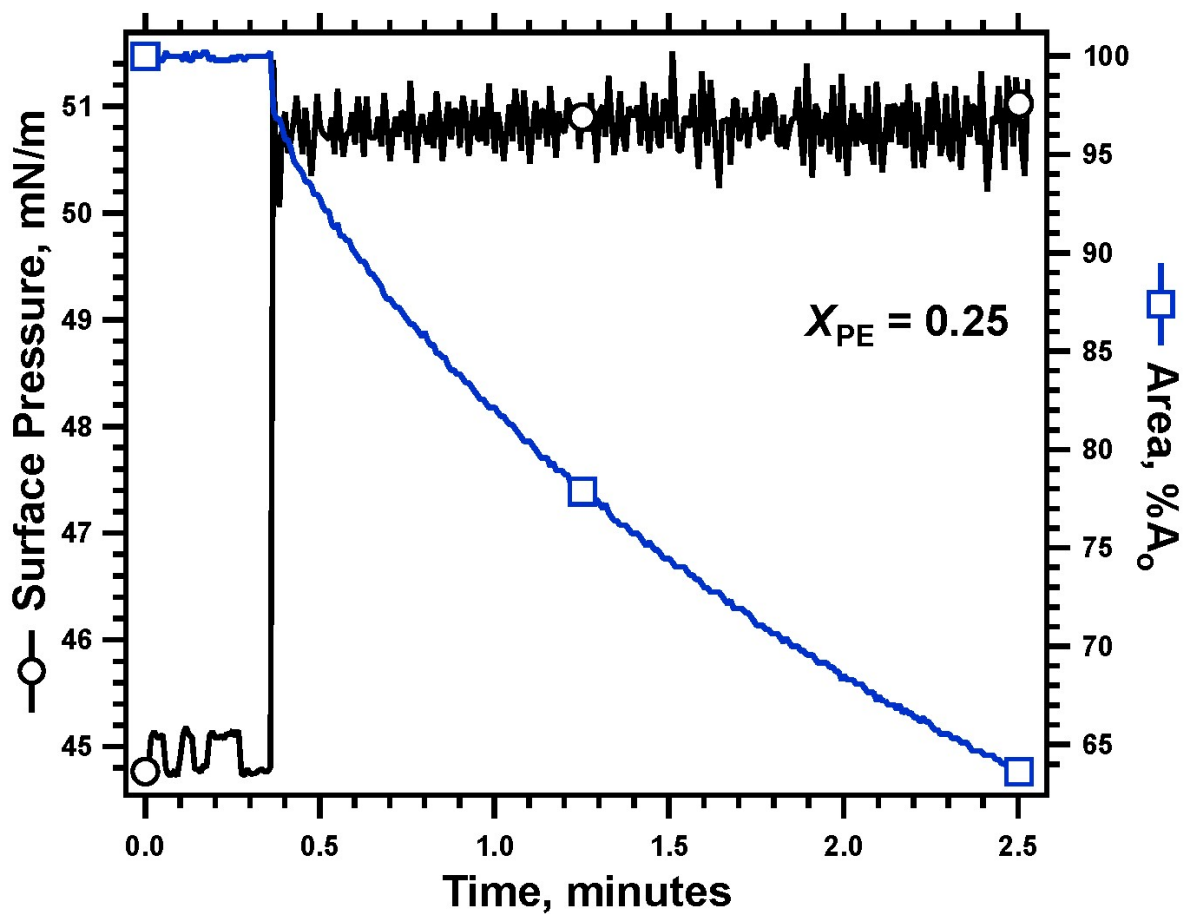

Fig 1SI. The following graph gives the temporal variation of surface pressure (left axis) and surface area (right axis) for a representative experiment, demonstrating the initial pulsed compression and subsequent isobaric compression of a monomolecular film of DOPC:DOPE with  $X_{PE} = 0.25$ .
